# Supplementary material
Source: ML conference proceedings conference paper supplement (https://openreview.net/forum?id=BcLwrLLi5xq)
Supplement: supplementary_material [file attachment]

Monotonic model: smooth transitions  
along generative factor

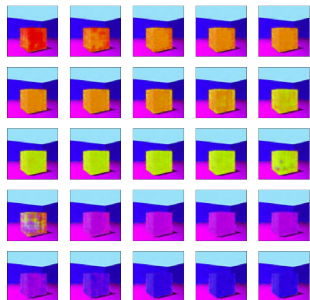

Baseline: disentangled but  
non-monotonic

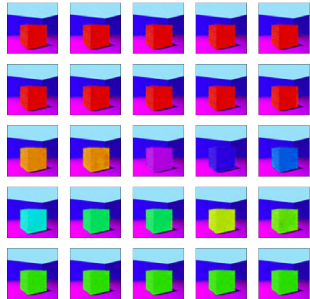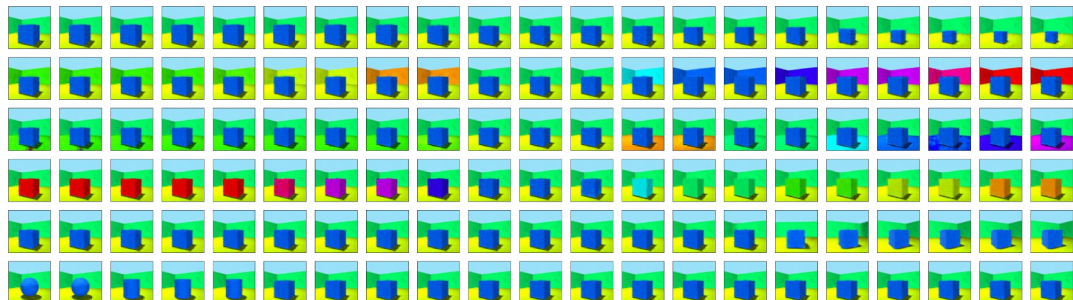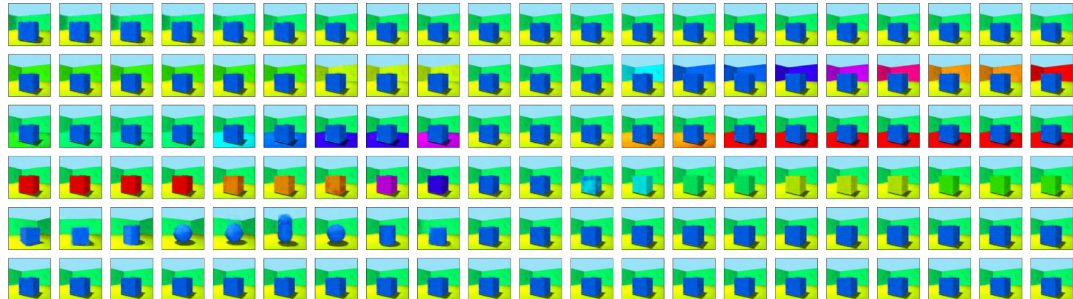

Size  
Wall color  
Floor color  
Object color  
Orientation  
Shape

Orientation  
Wall color  
Floor color  
Object color  
Shape  
Size

Monotonic model

Baseline
