# Supplementary material
Source: ML conference proceedings conference paper supplement (https://openreview.net/forum?id=BcLwrLLi5xq)
Supplement: supplementary_material [file attachment]

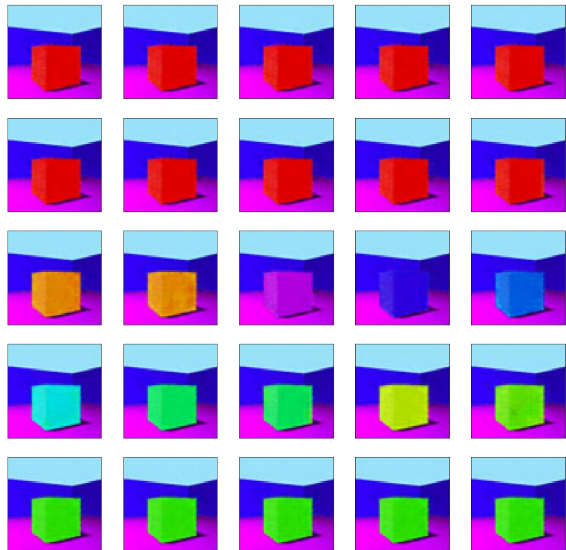

*Baseline: disentangled but  
non-monotonic*

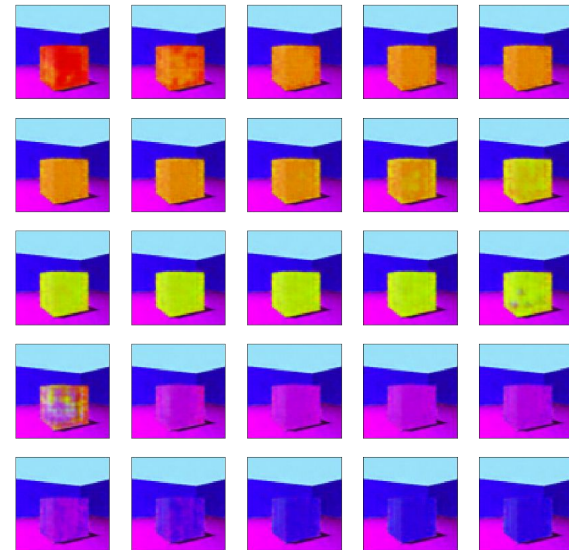

*Monotonic model: smooth transitions  
along generative factor*

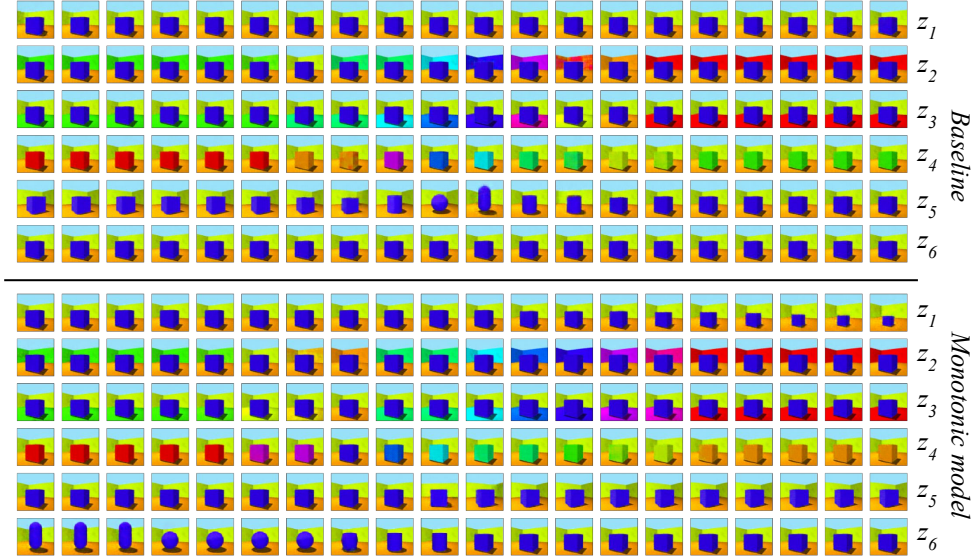

*Monotonic model*
